# Supplementary material
Source: publisher site journal article supplement (https://www.degruyter.com/fileasset/craft/media/supplements/znth_Mediadaten.pdf)
Supplement: Supplementary file 1 [file znth_Mediadaten.pdf]

ISSN 0943-7592, e-ISSN 1612-9776

# JOURNAL FOR THE HISTORY OF MODERN THEOLOGY

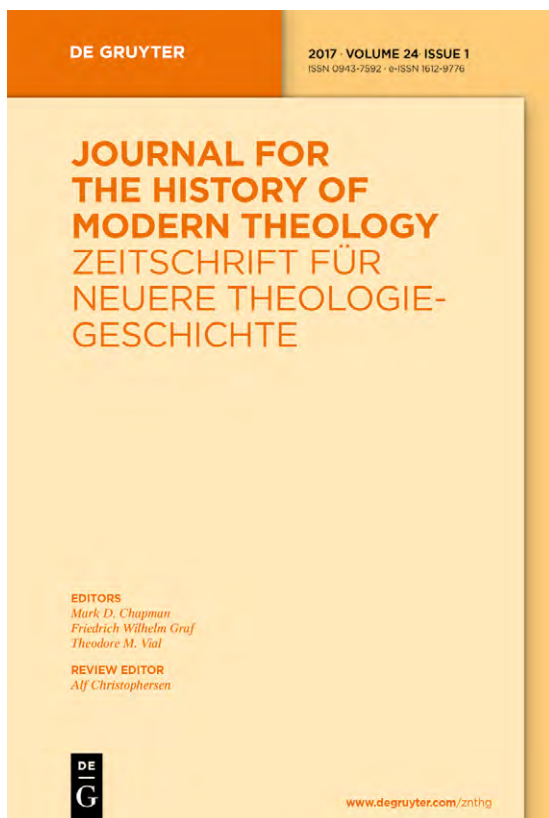

## Editor / Herausgeber

Mark D. Chapman, Theodore M. Vial, Jr., Friedrich Wilhelm Graf

## Profile / Kurzcharakteristik

*The Journal for the History of Modern Theology (JHMT)* is an academic journal. It is intended for theologians, historians, philosophers, scholars of religion and representatives of other academic disciplines. The contributions are either in English or German. An abstract in the other language respectively provides the reader with a brief summary of the article.

## Readership / Leserschaft

Institutes, libraries, scientists from the field of theology and religious studies

## Publication Frequency / Erscheinungsweise

2 issues per year

## ADVERTISING / ANZEIGEN

DE GRUYTER  
Claudia Neumann  
Genthiner Straße 13, D-10785 Berlin  
Phone: +49-(0)30.260 05-226  
Fax: +49-(0)30.260 05-264  
E-Mail: [claudia.neumann@degruyter.com](mailto:claudia.neumann@degruyter.com)

**Technical Facts/Technische Daten**

|                                             |                                                                                                                                                                                                              |
|---------------------------------------------|--------------------------------------------------------------------------------------------------------------------------------------------------------------------------------------------------------------|
| Format                                      | 155 mm × 230 mm                                                                                                                                                                                              |
| Printing area/<br>Satzspiegel               | 116 mm × 190 mm                                                                                                                                                                                              |
| Language/Sprache                            | Englisch                                                                                                                                                                                                     |
| Reach/Reichweite                            | Print Run/Druckauflage: available upon request/auf Anfrage<br>Page Impressions 2016: available upon request/auf Anfrage                                                                                      |
| Technical requirements/<br>Technische Daten | Delivery of data in PDF format. Contact: Claudia Neumann; Walter de Gruyter GmbH; Genthiner Straße 13; D-10785 Berlin; Tel.: +49-(0)30.260 05-226; Fax: +49-(0)30.260 05-322; E-Mail: anzeigen@degruyter.com |

**Calendar/Terminplan**

Dates can be changed/Terminänderungen vorbehalten

|                       |       |        |
|-----------------------|-------|--------|
| Issues                | 1/18  | 2/18   |
| Publishing date       | 15.5. | 20.10. |
| Advertising deadline  | 3.4.  | 11.9.  |
| Deadline for printing | 12.4. | 20.9.  |

**Advertising Prices/All rates quoted are excl. VAT/  
Anzeigenpreise/zzgl. gesetzl. MwSt.**

| Format                                          | (mm width/Breite ×<br>mm height/Höhe) | Rates (€) b/w/<br>Preis (€) s/w | Rates (€) 4c-process/<br>Preis (€) 4c |
|-------------------------------------------------|---------------------------------------|---------------------------------|---------------------------------------|
| 1/1                                             | 116 mm × 190 mm                       | 350,00                          | 750,00                                |
| 1/2                                             | 116 mm × 88 mm or<br>55 mm × 190 mm   | 210,00                          | 510,00                                |
| <b>Specific Postions/<br/>Sonderplatzierung</b> |                                       |                                 |                                       |
| U2, U3, U4                                      | 116 mm × 190 mm                       |                                 | 1.050,00                              |

**Supplements/Beilagen**

Prices are subject to change without notice./Plus VAT.  
Preisänderungen vorbehalten./zzgl. MwSt.

Supplements (without discount) up to 25 g. weight: 350,00 € per thousand copies  
Beilagen (nicht rabattfähig) bis zu 25 g Gewicht: 350,00 € pro tausend Exemplare

Delivery 10 days before publishing/Anlieferung 10 Tage vor Erscheinen
